# Supplementary material for: Protective Effects of Ammannia baccifera Against CCl4-Induced Oxidative Stress in Rats
Source: MDPI journal article supplement (doi:10.3390/ijerph16081440), 2019-04-23
Supplement: s1 [file s1]

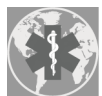

Supplementary Materials

## Protective Effects of *Ammannia baccifera* Against CCl<sub>4</sub>-Induced Oxidative Stress in Rats

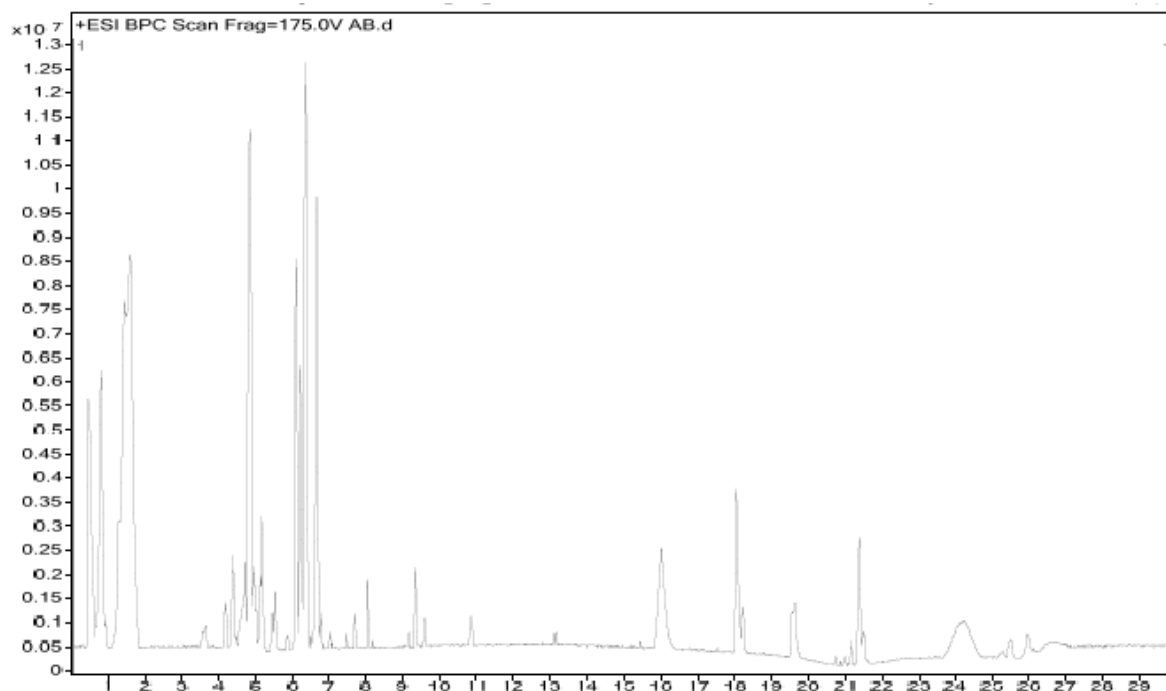

**Figure S1.** Total chromatogram of *Ammannia baccifera* ethanol extract in ESI positive mode by using UHPLC-QTOF MS.
